# Supplementary material for: The Carbon-Nitrogen Balance of the Nodule and Its Regulation under Elevated Carbon Dioxide Concentration
Source: Hindawi journal article supplement (doi:10.1155/2014/507946), 2014-01-01

Expression levels (y-axis) of Glyma19g42460, the soybean gene orthologous to PvNF-YC1, in various soybean tissues and at different stages of the nodulation process (x-axis) . The data were mined from two different studies (Libault et al.,2010; Severin at al., 2010) and the figure was generated using Soykb database (<http://soykb.org/>; Joshi et al., 2012).

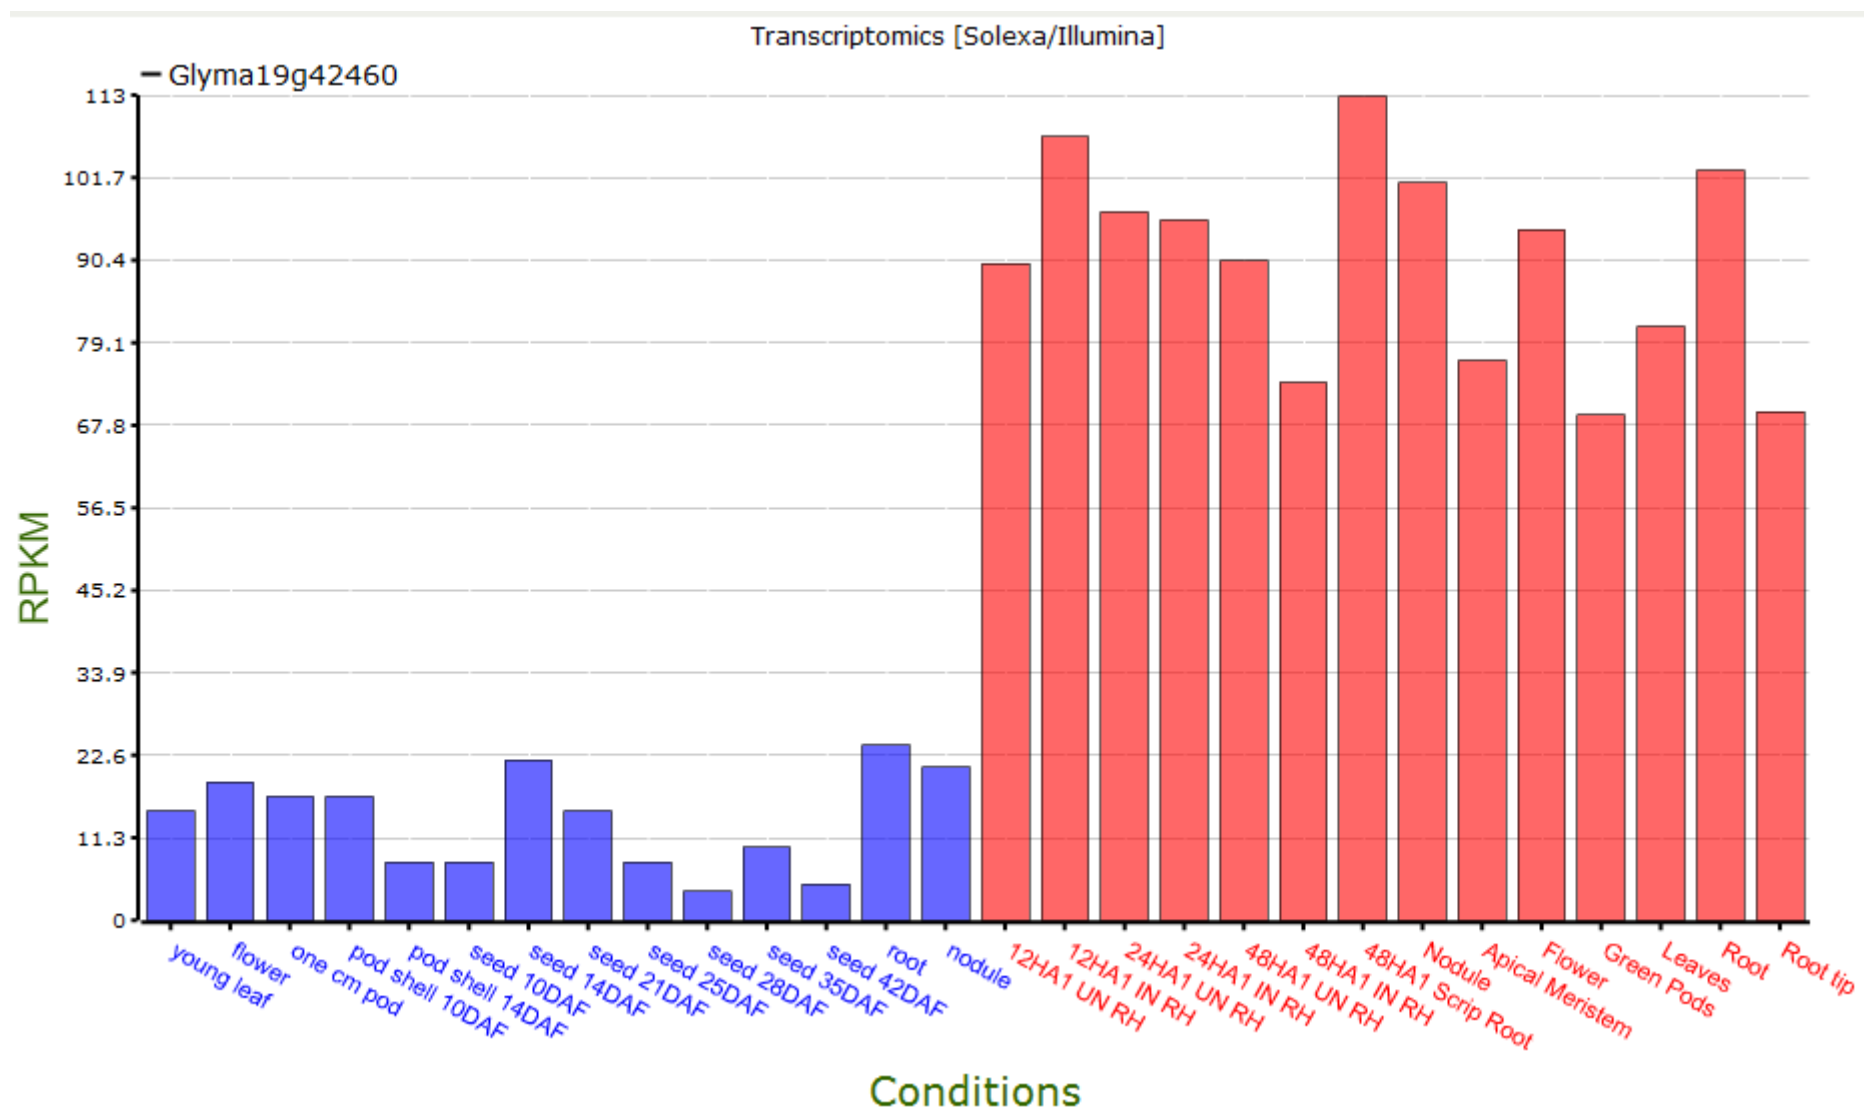

Supplemental Figure 2. Expression levels of Medtr5g005290, the medicago orthologs of GmNMNa. Similarly to Supplemental Figure 1, the various conditions, tissues and treatments of the plants used for transcriptomic analysis are indicated on the x-axis. The relative expression of the gene is indicated on the y-axis. The data were mined from the *Medicago truncatula* gene expression atlas (<http://mtgea.noble.org/v3/>; Benedito et al., 2008; He et al., 2009). Interestingly, MtNMNa is mostly expressed in response to *Sinorhizobium meliloti* and Nod factor treatments (black arrow) but is also induced in response to mycorrhiza and Myc-LCO (grey arrow).

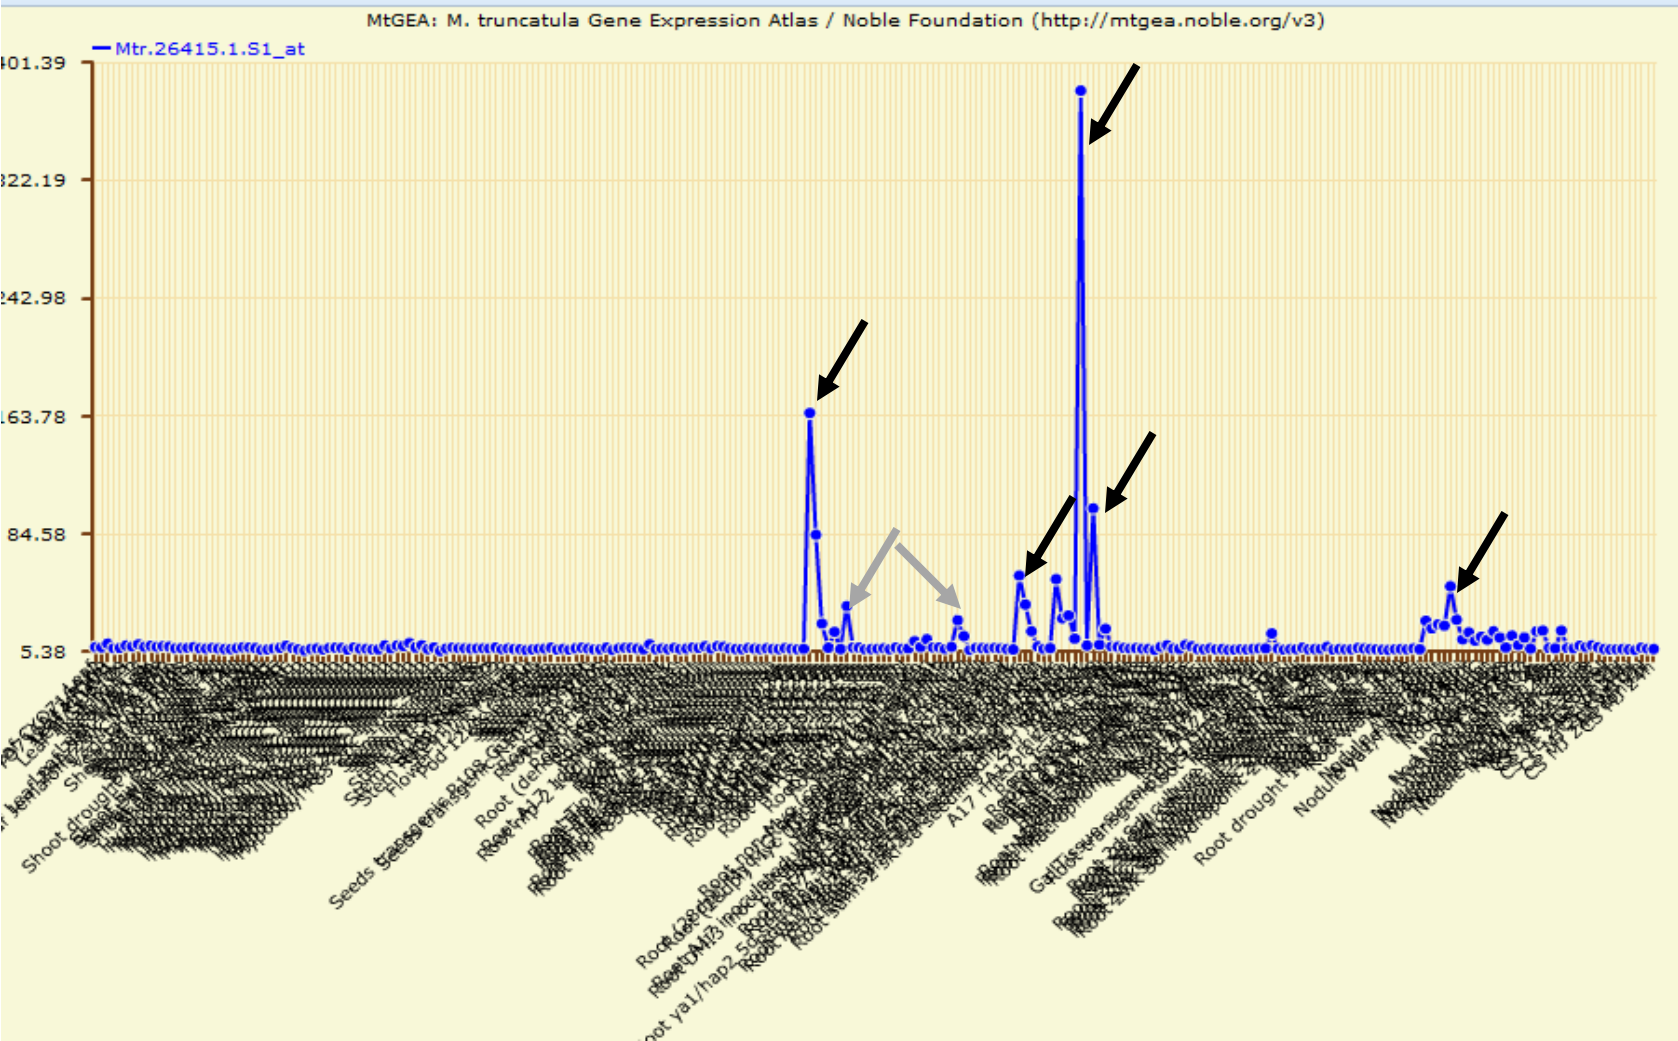

Supplement: f1 [file 507946.f1.pdf]
